# Supplementary material for: Visit-to-visit glycemic variability is a strong predictor of chronic obstructive pulmonary disease in patients with type 2 diabetes mellitus: Competing risk analysis using a national cohort from the Taiwan diabetes study
Source: PubMed Central journal article supplement (PMC5425194; doi:10.1371/journal.pone.0177184), 2017-05-10
Supplement: pone.0177184.s002.pdf [file pone.0177184.s002.pdf]

**S2 Table.** Standardized mean differences of baseline sociodemographic factors, life style behaviors, diabetes-related variables, drug-related variables, comorbidity and blood biochemical measurement among tertile groups of HbA1c-CV in patients with type 2 diabetes enrolled in the National Diabetes Care Management Program, Taiwan

| Variables                                | HbA1c-CV (%) standardized mean difference |                     |                          |                                |                     |                          |
|------------------------------------------|-------------------------------------------|---------------------|--------------------------|--------------------------------|---------------------|--------------------------|
|                                          | Unmatched population (N= 27,257)          |                     |                          | Matched population (N= 16,530) |                     |                          |
|                                          | ≤8.4% vs.<br>8.4%-17.1%                   | ≤8.4% vs.<br>>17.1% | 8.4%-17.1% vs.<br>>17.1% | ≤8.4% vs.<br>8.4%-17.1%        | ≤8.4% vs.<br>>17.1% | 8.4%-17.1%<br>vs. >17.1% |
| <i><u>Sociodemographic factors</u></i>   |                                           |                     |                          |                                |                     |                          |
| Gender                                   |                                           |                     |                          |                                |                     |                          |
| Female                                   | 0.01                                      | 0.08                | 0.07                     | -0.02                          | 0.00                | 0.02                     |
| Male                                     | -0.01                                     | -0.08               | -0.07                    | 0.02                           | 0.00                | -0.02                    |
| Age (years)                              | 0.01                                      | 0.12                | 0.11                     | -0.04                          | 0.03                | 0.07                     |
| <i><u>Lifestyle behaviors</u></i>        |                                           |                     |                          |                                |                     |                          |
| Smoking                                  | -0.01                                     | -0.10               | -0.09                    | 0.03                           | -0.02               | -0.05                    |
| Alcohol drinking                         | -0.03                                     | -0.06               | -0.03                    | 0.01                           | -0.01               | -0.02                    |
| <i><u>Diabetes-related variables</u></i> |                                           |                     |                          |                                |                     |                          |
| Duration of diabetes (years)             | 0.01                                      | 0.18                | 0.17                     | -0.06                          | 0.08                | -0.13                    |
| Type of hypoglycemic drug use            |                                           |                     |                          |                                |                     |                          |
| No medication                            | 0.07                                      | 0.07                | 0.00                     | 0.02                           | -0.04               | -0.06                    |
| One oral hypoglycemic drug               | 0.15                                      | 0.18                | 0.03                     | 0.03                           | -0.06               | -0.09                    |
| Two oral hypoglycemic drugs              | 0.03                                      | 0.03                | 0.00                     | 0.04                           | 0.04                | 0.00                     |
| Three oral hypoglycemic drugs            | -0.07                                     | -0.07               | -0.01                    | -0.02                          | 0.02                | 0.04                     |
| >3 oral hypoglycemic drugs               | -0.04                                     | -0.08               | -0.05                    | 0.01                           | -0.01               | -0.02                    |
| Insulin                                  | -0.02                                     | 0.03                | 0.06                     | -0.04                          | -0.01               | 0.04                     |
| Insulin+ oral hypoglycemic drug          | -0.13                                     | -0.14               | -0.01                    | -0.06                          | 0.00                | 0.06                     |
| <i><u>Drug-related variables</u></i>     |                                           |                     |                          |                                |                     |                          |
| Hypertension drug treatment              | 0.06                                      | 0.16                | 0.10                     | -0.03                          | 0.02                | 0.04                     |
| Glucocorticoids                          | 0.00                                      | -0.01               | -0.01                    | 0.01                           | 0.00                | -0.01                    |
| <i><u>Comorbidity</u></i>                |                                           |                     |                          |                                |                     |                          |

|                                               |       |       |       |       |       |       |
|-----------------------------------------------|-------|-------|-------|-------|-------|-------|
| Obesity                                       | 0.00  | 0.05  | 0.05  | -0.02 | 0.00  | 0.02  |
| CAD                                           | -0.01 | 0.05  | 0.06  | -0.03 | 0.02  | 0.05  |
| CHF                                           | -0.03 | -0.02 | 0.01  | -0.03 | 0.02  | 0.05  |
| Cancer                                        | 0.00  | -0.01 | -0.01 | 0.02  | 0.00  | -0.02 |
| Hyperlipidemia                                | 0.05  | 0.14  | 0.08  | -0.02 | 0.01  | 0.03  |
| Hypertension                                  | 0.02  | 0.14  | 0.12  | -0.05 | 0.01  | 0.06  |
| Atrial fibrillation                           | 0.00  | 0.00  | 0.00  | -0.02 | 0.00  | 0.02  |
| Chronic hepatitis                             | -0.03 | 0.00  | 0.03  | -0.03 | 0.01  | 0.04  |
| Diabetic retinopathy                          | -0.02 | -0.01 | 0.02  | 0.00  | 0.03  | 0.02  |
| Hypoglycemia                                  | 0.00  | 0.00  | 0.00  | 0.01  | 0.01  | -0.01 |
| Pneumonia                                     | -0.01 | -0.02 | -0.01 | 0.00  | 0.02  | 0.01  |
| Other diseases of the upper respiratory tract | 0.02  | 0.02  | 0.00  | 0.00  | 0.00  | 0.00  |
| Acute respiratory infections                  | 0.01  | 0.03  | 0.02  | 0.01  | 0.02  | 0.01  |
| <i><u>Blood biochemical measurement</u></i>   |       |       |       |       |       |       |
| Fasting plasma glucose                        | -0.19 | -0.38 | -0.20 | 0.00  | -0.02 | -0.03 |
| HbA1c                                         | -0.24 | -0.52 | -0.28 | 0.02  | -0.02 | -0.04 |
| FPG-CV                                        | -0.23 | -0.66 | -0.46 | 0.03  | -0.07 | -0.10 |

CAD: coronary artery disease; CHF: congestive heart failure; FPG-CV: coefficient of variation of fasting plasma glucose; HbA1c-CV: coefficient of variation of HbA1c.
